# Supplementary material for: Estimating Bacterial Diversity for Ecological Studies: Methods, Metrics, and Assumptions
Source: PubMed Central journal article supplement (PMC4411174; doi:10.1371/journal.pone.0125356), 2015-04-27
Supplement: pone.0125356.s008.pdf [file pone.0125356.s008.pdf]

**S1 Table:** Number of quality filtered reads of the different lakes and variable regions of the 16S rRNA (untrimmed and trimmed reads).

| Lake name                            | Abbreviaton | Number of reads after quality filtering |       |       |       |       |       |
|--------------------------------------|-------------|-----------------------------------------|-------|-------|-------|-------|-------|
|                                      |             | untrimmed                               | V3    | V4    | V5    | V3-V4 | V4-V5 |
| Baldeggersee                         | Ba          | 4809                                    | 1211  | 1561  | 1065  | 389   | 301   |
| Bielensee                            | Bi          | 5584                                    | 1141  | 2052  | 1003  | 359   | 315   |
| Brienzersee                          | Br          | 7134                                    | 1069  | 2711  | 926   | 197   | 250   |
| Burgäschisee                         | Bu          | 5537                                    | 1199  | 1865  | 1109  | 365   | 332   |
| Caumasee                             | Ca          | 4344                                    | 901   | 1559  | 683   | 184   | 212   |
| Greifensee                           | Gr          | 6302                                    | 1207  | 1614  | 1384  | 245   | 232   |
| Halwilersee                          | Ha          | 6337                                    | 992   | 2034  | 943   | 192   | 209   |
| Inkwilersee                          | In          | 4256                                    | 918   | 1449  | 920   | 243   | 238   |
| Lag Grand                            | LG          | 6116                                    | 1011  | 2162  | 1405  | 219   | 285   |
| Melchsee                             | Me          | 7959                                    | 1445  | 3058  | 1242  | 240   | 277   |
| Murtensee                            | Mu          | 8461                                    | 1634  | 2872  | 1565  | 422   | 432   |
| Neuenburgersee                       | Ne          | 5221                                    | 990   | 1730  | 974   | 250   | 233   |
| Rotsee                               | Ro          | 5253                                    | 1154  | 1684  | 1082  | 360   | 330   |
| Sempachersee                         | Se          | 3508                                    | 754   | 962   | 691   | 237   | 195   |
| Soppensee                            | So          | 5074                                    | 959   | 1757  | 954   | 209   | 229   |
| Thunersee                            | Th          | 5455                                    | 941   | 1798  | 901   | 268   | 268   |
| Türlersee                            | Tu          | 5124                                    | 1081  | 1594  | 1059  | 281   | 257   |
| Vierwaldstättersee                   | Vi          | 5262                                    | 1074  | 1869  | 969   | 361   | 333   |
| Zürichsee                            | ZS          | 5569                                    | 1113  | 1288  | 1184  | 222   | 189   |
| Zugersee                             | Zu          | 5557                                    | 995   | 1804  | 844   | 218   | 197   |
| Total # of reads                     |             | 112917                                  | 21798 | 37432 | 20909 | 5461  | 5315  |
| Mean # of reads (Standard deviation) |             | 5643 (1155)                             | 1089  | 1871  | 1045  | 273   | 266   |
