# Supplementary material for: Estimating Bacterial Diversity for Ecological Studies: Methods, Metrics, and Assumptions
Source: PubMed Central journal article supplement (PMC4411174; doi:10.1371/journal.pone.0125356), 2015-04-27
Supplement: pone.0125356.s009.pdf [file pone.0125356.s009.pdf]

**S2 Table:** Positions of 11-mers used for subsetting the quality filtered Illumina reads as well as the number of nucleotides (nt) of the trimmed datasets. Positions are given relative to E. coli 16S rRNA positions.

| 16S region | 11-mer position | reading direction | # of nt |
|------------|-----------------|-------------------|---------|
| V3         | 518-508         | reverse           | 120     |
| V4         | 558-568         | forward           | 120     |
| V5         | 779-789         | forward           | 100     |
| V3-V4      | 415-425         | forward           | 460     |
| V4-V5      | 789-779         | reverse           | 310     |
