# Supplementary material for: Estimating Bacterial Diversity for Ecological Studies: Methods, Metrics, and Assumptions
Source: PubMed Central journal article supplement (PMC4411174; doi:10.1371/journal.pone.0125356), 2015-04-27
Supplement: pone.0125356.s010.pdf [file pone.0125356.s010.pdf]

**S3 Table:** Environmental parameters of the lakes that were sampled for this study.

| Lake                    | Sampling date | Sampling location [Lat, Long] | maximum Depth [m] | Elevation [m] | DOC [mg C/L] | NO <sub>3</sub> [mg/L] | PO <sub>4</sub> [ $\mu$ g/L] | Temp [°C] | pH   | Oxygen [mg/L] | Chl a [mg/L] | Secchi depth [m] |
|-------------------------|---------------|-------------------------------|-------------------|---------------|--------------|------------------------|------------------------------|-----------|------|---------------|--------------|------------------|
| Baldeggersee (Ba)       | 10-10-2011    | 47.0509 N 7.1026 E            | 66                | 463           | 4.0          | 0.8                    | 0.5                          | 15.82     | 7.97 | 9.63          | 32.13        | 1.5              |
| Bielersee (Bi)          | 14-09-2011    | 46.4340 N 7.5757 E            | 74                | 429           | 1.7          | 0.6                    | 1.4                          | 20.09     | 8.12 | 9.35          | 3.12         | 4.5              |
| Brienzersee (Br)        | 12-07-2011    | 47.1008 N 7.4004 E            | 261               | 564           | 1.7          | 0.3                    | 4.4                          | 17.83     | 8.27 | 10.00         | 0.96         | 3.0              |
| Burgaschisee (Bu)       | 05-10-2011    | 46.4911 N 9.1745 E            | 31                | 465           | 7.6          | 0.7                    | 1.3                          | 19.38     | 8.35 | 9.74          | 6.06         | 4.0              |
| Caumasee (Ca)           | 19-07-2011    | 47.2110 N 8.4037 E            | 30                | 997           | 1.2          | 0.3                    | 1.0                          | 16.90     | 8.58 | 8.81          | 1.64         | 7.0              |
| Greifensee (Gr)         | 15-07-2011    | 47.1749 N 8.1239 E            | 32                | 435           | 4.4          | 1.5                    | 1.9                          | 21.90     | 8.35 | 11.41         | 9.98         | 2.5              |
| Halwilersee (Ha)        | 13-07-2011    | 47.1152 N 7.3943 E            | 47                | 449           | 8.5          | 0.6                    | 4.2                          | 23.06     | 8.30 | 9.83          | 1.74         | 6.0              |
| Inkwilersee (In)        | 05-10-2011    | 46.4828 N 9.1525 E            | 6                 | 461           | 7.5          | 0.3                    | 2.1                          | 17.75     | 7.21 | 4.21          | 37.46        | 1.5              |
| Lag Grond (LG)          | 19-07-2011    | 46.4622 N 8.1622 E            | 5                 | 1016          | 2.8          | 0.3                    | 1.0                          | 17.41     | 7.80 | 6.26          | 11.15        | 1.5              |
| Melchsee (Me)           | 12-07-2011    | 46.5555 N 7.0506 E            | 18                | 1891          | 2.9          | 0.3                    | 4.4                          | 17.58     | 8.00 | 8.71          | 2.82         | 4.0              |
| Murtensee (Mu)          | 15-09-2011    | 46.5421 N 6.5132 E            | 45                | 429           | 3.8          | 1.4                    | 1.7                          | 20.73     | 8.20 | 9.46          | 10.50        | 2.0              |
| Neuenburgersee (Ne)     | 14-09-2011    | 47.0227 N 8.1106 E            | 153               | 429           | 2.6          | 0.7                    | 1.2                          | 21.10     | 7.97 | 9.40          | 2.26         | 7.0              |
| Rotsee (Ro)             | 06-10-2011    | 47.1138 N 8.2110 E            | 16                | 419           | 1.8          | 0.3                    | 2.3                          | 18.71     | 8.61 | 12.76         | 8.37         | 3.0              |
| Sempachersee (Se)       | 17-10-2011    | 47.0838 N 8.0907 E            | 87                | 505           | 3.8          | 0.3                    | 1.0                          | 15.31     | 8.31 | 8.55          | 4.42         | 4.5              |
| Soppensee (So)          | 18-07-2011    | 47.0523 N 8.0451 E            | 28                | 596           | 6.4          | 0.9                    | 1.2                          | 21.00     | 8.49 | 11.42         | 6.15         | 3.5              |
| Thunersee (Th)          | 11-07-2011    | 46.4246 N 7.4022 E            | 217               | 558           | 1.1          | 0.4                    | 3.2                          | 18.27     | 8.39 | 9.66          | 0.71         | 6.5              |
| Türlersee (Tu)          | 20-07-2011    | 47.1612 N 8.3010 E            | 22                | 643           | 3.8          | 0.3                    | 1.0                          | 19.85     | 8.45 | 11.77         | 12.14        | 3.0              |
| Vierwaldstättersee (Vi) | 14-10-2011    | 47.0108 N 8.2403 E            | 214               | 434           | 1.2          | 0.4                    | 1.0                          | 14.75     | 8.15 | 9.50          | 2.62         | 6.2              |
| Zugersee (Zu)           | 14-07-2011    | 47.0939 N 8.2858 E            | 198               | 413           | 6.9          | 0.3                    | 6.0                          | 22.42     | 8.11 | 9.75          | 4.06         | 3.0              |
| Zürichsee (ZS)          | 22-07-2011    | 47.1734 N 8.3437 E            | 136               | 407           | 1.6          | 0.5                    | 1.0                          | 19.75     | 8.25 | 10.23         | 4.46         | 3.0              |
