# Supplementary material for: Estimating Bacterial Diversity for Ecological Studies: Methods, Metrics, and Assumptions
Source: PubMed Central journal article supplement (PMC4411174; doi:10.1371/journal.pone.0125356), 2015-04-27
Supplement: pone.0125356.s011.pdf [file pone.0125356.s011.pdf]

**S4 Table:** Linear model statistics of species richness (SR; ARISA and Illumina sequencing) and phylogenetic diversity (PD) versus environmental parameter.

| Parameter       | ARISA<br>slope (p-value) | V3 SR<br>s (p) | V4 SR<br>s (p) | V5 SR<br>s (p) | SR<br>F-value (p) | V3 PD<br>s (p) | V4 PD<br>s (p) | V5 PD<br>s (p) | PD<br>F-value (p) |
|-----------------|--------------------------|----------------|----------------|----------------|-------------------|----------------|----------------|----------------|-------------------|
| MaxDepth        | 0.02 (0.51)              | -7.18 (0.37)   | -1.85 (0.79)   | -1.51 (0.83)   | 0.20 (0.82)       | -0.13 (0.78)   | -1.02 (0.17)   | -0.18 (0.65)   | 0.88 (0.42)       |
| Elevation       | -0.01 (0.14)             | -21.97 (0.35)  | 18.39 (0.36)   | -8.19 (0.69)   | 0.97 (0.39)       | -0.51 (0.71)   | -0.31 (0.89)   | -0.42 (0.71)   | 0.00 (1.00)       |
| DOC             | -0.54 (0.65)             | 0.45 (0.98)    | -13.75 (0.24)  | -11.29 (0.35)  | 0.38 (0.69)       | -0.55 (0.50)   | -0.22 (0.87)   | -0.43 (0.53)   | 0.03 (0.97)       |
| NO <sub>3</sub> | -2.79 (0.72)             | 27.54 (0.10)   | 21.87 (0.13)   | 20.75 (0.16)   | 0.06 (0.94)       | 0.88 (0.38)    | 2.45 (0.12)    | 0.89 (0.28)    | 0.64 (0.53)       |
| PO <sub>4</sub> | -0.83 (0.66)             | -28.79 (0.03)  | -7.92 (0.51)   | -22.46 (0.05)  | 0.85 (0.43)       | -0.40 (0.62)   | -2.59 (0.04)   | -1.16 (0.08)   | 1.56 (0.22)       |
| Temp            | -1.22 (0.31)             | -73.22 (0.32)  | -24.78 (0.70)  | -87.46 (0.16)  | 0.26 (0.77)       | -1.14 (0.79)   | -6.27 (0.37)   | -4.52 (0.20)   | 0.27 (0.76)       |
| pH              | -1.55 (0.87)             | 66.21 (0.78)   | 160.57 (0.42)  | 140.00 (0.49)  | 0.06 (0.95)       | 10.44 (0.44)   | 12.76 (0.57)   | 11.23 (0.32)   | 0.01 (1.00)       |
| DO              | 0.10 (0.95)              | 34.11 (0.38)   | 39.69 (0.23)   | 39.54 (0.24)   | 0.01 (0.99)       | 3.84 (0.08)    | 3.29 (0.37)    | 2.62 (0.16)    | 0.05 (0.95)       |
| Chla            | 0.26 (0.37)              | 20.54 (0.01)   | -0.58 (0.94)   | 9.39 (0.22)    | 2.04 (0.14)       | 0.50 (0.33)    | 1.80 (0.02)    | 0.56 (0.18)    | 1.75 (0.18)       |
| Secchi          | -0.85 (0.58)             | -24.48 (0.18)  | 7.31 (0.64)    | -4.81 (0.77)   | 0.97 (0.39)       | -0.27 (0.81)   | -1.88 (0.28)   | -0.33 (0.71)   | 0.53 (0.59)       |
