# Supplementary material for: Estimating Bacterial Diversity for Ecological Studies: Methods, Metrics, and Assumptions
Source: PubMed Central journal article supplement (PMC4411174; doi:10.1371/journal.pone.0125356), 2015-04-27
Supplement: pone.0125356.s012.pdf [file pone.0125356.s012.pdf]

**S5 Table:** Linear model statistics of species richness (SR) estimates from ARISA and Illumina sequencing at different sequence similarity threshold (SST) clustering values.

| 16S region | SST       | slope | R <sup>2</sup> | F-value | p-value |
|------------|-----------|-------|----------------|---------|---------|
| V3         | 85        | 0.76  | 0.20           | 4.59    | 0.05    |
| V3         | 90        | 0.95  | 0.18           | 3.85    | 0.07    |
| V3         | 95        | 1.27  | 0.18           | 3.81    | 0.07    |
| <b>V3</b>  | <b>97</b> | 1.42  | 0.18           | 3.99    | 0.06    |
| V3         | 99        | 1.38  | 0.19           | 4.09    | 0.06    |
| V4         | 85        | 0.71  | 0.12           | 2.54    | 0.13    |
| V4         | 90        | 0.67  | 0.08           | 1.66    | 0.21    |
| V4         | 95        | 0.10  | 0.00           | 0.03    | 0.87    |
| <b>V4</b>  | <b>97</b> | -0.25 | 0.01           | 0.14    | 0.72    |
| V4         | 99        | -0.66 | 0.05           | 0.86    | 0.37    |
| V5         | 85        | 0.40  | 0.09           | 1.85    | 0.19    |
| V5         | 90        | 0.65  | 0.13           | 2.68    | 0.12    |
| V5         | 95        | 1.01  | 0.15           | 3.21    | 0.09    |
| <b>V5</b>  | <b>97</b> | 1.22  | 0.18           | 3.89    | 0.06    |
| V5         | 99        | 1.37  | 0.19           | 4.24    | 0.05    |
