# Supplementary material for: Estimating Bacterial Diversity for Ecological Studies: Methods, Metrics, and Assumptions
Source: PubMed Central journal article supplement (PMC4411174; doi:10.1371/journal.pone.0125356), 2015-04-27
Supplement: pone.0125356.s013.pdf [file pone.0125356.s013.pdf]

**S6 Table:** Paired t-test results of the ten most abundant bacterial classes.

| Bacterial class*      | global        | V3 / V4     |         | V3 / V5     |         | V4 / V5     |         |
|-----------------------|---------------|-------------|---------|-------------|---------|-------------|---------|
|                       | Abundance [%] | T-statistic | p-value | T-statistic | p-value | T-statistic | p-value |
| Betaproteobacteria    | 33.16         | -12.58      | <0.01   | 10.81       | <0.01   | 19.19       | <0.01   |
| Alphaproteobacteria   | 8.53          | 1.14        | 0.27    | -3.48       | <0.01   | -3.20       | <0.01   |
| Gammaproteobacteria   | 5.66          | 2.99        | <0.01   | 3.23        | <0.01   | 1.19        | 0.25    |
| Synechococcophycideae | 5.33          | -4.54       | <0.01   | -1.63       | 0.12    | 3.39        | <0.01   |
| Flavobacteriia        | 5.16          | 10.08       | <0.01   | 2.82        | 0.01    | -13.24      | <0.01   |
| [Saprospirae]*        | 4.42          | 13.65       | <0.01   | -2.98       | <0.01   | -12.16      | <0.01   |
| Chloroplasts          | 3.90          | -0.42       | 0.68    | -4.97       | <0.01   | -3.10       | <0.01   |
| Deltaproteobacteria   | 1.78          | -3.62       | <0.01   | -2.72       | 0.01    | 1.68        | 0.11    |
| [Methylacidiphilae]*  | 1.64          | 3.66        | <0.01   | -2.14       | 0.05    | -3.24       | <0.01   |
| Sphingobacteriia      | 1.59          | 8.68        | <0.01   | 0.75        | 0.47    | -7.50       | <0.01   |

\*Note: Data was calculated for the ten most abundant classes across the complete dataset. Square brackets indicate candidate class names.
